# Supplementary material
Source: Springer Nature journal article supplement (https://www.springermedizin.de/resource/supplementary/13229_2012_49_MOESM2_ESM.pdf/9676050)
Supplement: MOESM2 [file 9676050]

# CONSORT Flow Diagram

**Enrollment**

Assessed for eligibility (n=23)

Excluded (n= 4)

- ◆ Not meeting inclusion criteria (n=4)
- ◆ Declined to participate (n= 0)
- ◆ Other reasons (n=0)

Randomized (n=19)

**Allocation**

Allocated to IN-OXT (n=10)

- ◆ Received allocated intervention (n=10)
- ◆ Did not receive allocated intervention (n=0)

Allocated to placebo (n=9)

- ◆ Received allocated intervention (n=9)
- ◆ Did not receive allocated intervention (n=0)

**Follow-Up**

Lost to follow-up (n=0)  
Discontinued intervention (n=1) (week 4,  
question of staring spells)

Lost to follow-up (n=0)  
Discontinued intervention (n= 2) (one at  
week 4 for increased tics, one at baseline for  
not tolerating intranasal formulation)

**Analysis**

Analysed (n=10)

- ◆ Excluded from analysis (n= 0)

Analysed (n=9)

- ◆ Excluded from analysis (n=0)
